# Supplementary material for: Meta-analyses of QTL for grain yield and anthesis silking interval in 18 maize populations evaluated under water-stressed and well-watered environments
Source: PubMed Central journal article supplement (PMC3751468; doi:10.1186/1471-2164-14-313), 2013-05-10
Supplement: 1471-2164-14-313-S1.pdf [file 1471-2164-14-313-S1.pdf]

**Additional data file 1:** Summary of the population-specific QTLs found by Composite Interval Mapping for grain yield (GY) and anthesis-silking interval (ASI) for 18 maize populations evaluated under managed water stressed (WS) and well-watered (WW) environments. See Table 3 for details in population code.

| S/N | Population code | Original QTL name | Chromosome | Trait | Environment | LOD score | R <sup>2</sup> | QTL position (cM) | Confidence interval (cM) | Left flanking marker | Right flanking marker | Parental source |
|-----|-----------------|-------------------|------------|-------|-------------|-----------|----------------|-------------------|--------------------------|----------------------|-----------------------|-----------------|
| 1   | 6x1028          | GY1               | 1          | GY    | WW          | 4.3       | 9.0            | 2.0               | 0_8                      | ZM00150120           | ZM00150927            | CZL074          |
| 2   | 6x1116          | ASI1              | 1          | ASI   | WW          | 2.9       | 8.4            | 4.0               | 0_10                     | ZM00150120           | ZM00148041            | CKL09007        |
| 3   | 6x1008          | ASI2              | 1          | ASI   | WW          | 3.4       | 5.6            | 8.0               | 4_14                     | ZM00149412           | ZM00149263            | CML505          |
| 4   | 6x1122          | ASI3-WS           | 1          | ASI   | WS          | 2.9       | 5.6            | 18.0              | 16_22                    | ZM00150142           | ZM00146451            | CZL03011        |
| 5   | 6x1020          | GY2               | 1          | GY    | WW          | 2.8       | 2.6            | 26.0              | 20_30                    | ZM00151177           | ZM00147847            | CZL0723         |
| 6   | 6x1024          | GY3               | 1          | GY    | WW          | 2.9       | 4.6            | 26.0              | 12_34                    | ZM00150777           | ZM00151649            | CZL02001        |
| 7   | 6x1018          | GY4               | 1          | GY    | WW          | 3.6       | 6.3            | 32.0              | 16_48                    | ZM00145772           | ZM00147873            | CZL99017        |
| 8   | 6x1021          | GY5               | 1          | GY    | WW          | 3.1       | 5.8            | 38.0              | 34_44                    | ZM00149853           | ZM00148432            | CZL0719         |
| 9   | 6x1117          | GY6               | 1          | GY    | WW          | 3.8       | 5.0            | 42.0              | 38_44                    | ZM00145997           | ZM00151635            | CML444          |
| 10  | 6x1016          | GY7               | 1          | GY    | WW          | 3.1       | 10.3           | 44.0              | 36_54                    | ZM00151046           | ZM00150077            | CZL99017        |
| 11  | 6x1121          | GY8               | 1          | GY    | WW          | 3.2       | 18.9           | 44.0              | 40_46                    | ZM00145477           | ZM00150142            | CZL03011        |
| 12  | 6x1015          | GY9               | 1          | GY    | WW          | 3.9       | 6.9            | 54.0              | 44_56                    | ZM00147873           | ZM00147847            | CZL04003        |
| 13  | 6x1017          | GY10              | 1          | GY    | WW          | 3.5       | 9.3            | 54.0              | 46_58                    | ZM00151649           | ZM00148432            | CZL00009        |
| 14  | 6x1020          | GY11              | 1          | GY    | WW          | 3.2       | 7.1            | 54.0              | 44_60                    | ZM00148079           | ZM00151207            | CZL0723         |
| 15  | 6x1122          | ASI4              | 1          | ASI   | WW          | 4.3       | 5.9            | 64.0              | 62_66                    | ZM00148343           | ZM00151635            | CZL03011        |
| 16  | 6x1023          | ASI5              | 1          | ASI   | WW          | 3.1       | 5.9            | 78.0              | 72_82                    | ZM00150654           | ZM00150417            | CZL0618         |
| 17  | 6x1021          | GY12              | 1          | GY    | WW          | 3.3       | 7.6            | 80.0              | 66_88                    | ZM00148335           | ZM00150417            | CZL0723         |
| 18  | 6x1019          | GY13              | 1          | GY    | WW          | 3.2       | 4.7            | 92.0              | 84_104                   | ZM00148267           | ZM00150417            | CZL04008        |
| 19  | 6x1028          | ASI6              | 1          | ASI   | WW          | 3.4       | 9.0            | 98.0              | 86_106                   | ZM00150636           | ZM00151640            | VL062645        |
| 20  | 6x1020          | ASI7              | 1          | ASI   | WW          | 2.9       | 5.9            | 100.0             | 92_106                   | ZM00147369           | ZM00150566            | CZL0723         |
| 21  | 6x1028          | ASI8-WS           | 1          | ASI   | WS          | 4.4       | 8.7            | 104.0             | 100_110                  | ZM00151640           | ZM00147369            | VL062645        |
| 22  | 6x1020          | ASI9              | 1          | ASI   | WW          | 2.5       | 12.3           | 128.0             | 118_136                  | ZM00145787           | ZM00148508            | CZL0724         |
| 23  | 6x1021          | ASI10             | 1          | ASI   | WW          | 2.7       | 5.3            | 160.0             | 152_168                  | ZM00151633           | ZM00147772            | CZL0723         |
| 24  | 6x1021          | GY14-WS           | 1          | GY    | WS          | 3.0       | 2.7            | 186.0             | 184_192                  | ZM00150677           | ZM00149480            | CZL0723         |
| 25  | 6x1021          | GY15              | 2          | GY    | WW          | 3.7       | 9.1            | 2.0               | 0_12                     | ZM00148261           | ZM00148541            | CZL0719         |
| 26  | 6x1116          | GY16              | 2          | GY    | WW          | 5.1       | 12.7           | 8.0               | 4_12                     | ZM00150949           | ZM00150756            | CML395          |
| 27  | 6x1116          | ASI11             | 2          | ASI   | WW          | 3.1       | 3.2            | 14.0              | 8_22                     | ZM00150949           | ZM00150756            | CKL09007        |
| 28  | 6x1015          | GY17              | 2          | GY    | WW          | 4.4       | 5.1            | 18.0              | 6_22                     | ZM00145538           | ZM00149920            | CZL00009        |
| 29  | 6x1019          | ASI12             | 2          | ASI   | WW          | 3.9       | 6.9            | 18.0              | 6_32                     | ZM00151215           | ZM00145278            | CZL0719         |
| 30  | 6x1122          | ASI13             | 2          | ASI   | WW          | 3.3       | 11.0           | 18.0              | 12_20                    | ZM00149920           | ZM00145278            | CKL09006        |
| 31  | 6x1020          | GY18              | 2          | GY    | WW          | 2.6       | 8.5            | 22.0              | 20_36                    | ZM00150756           | ZM00146728            | CZL0724         |
| 32  | 6x1028          | ASI14             | 2          | ASI   | WW          | 4.3       | 8.8            | 24.0              | 14_30                    | ZM00150362           | ZM00147397            | VL062645        |
| 33  | 6x1116          | GY19-WS           | 2          | GY    | WS          | 2.7       | 3.1            | 26.0              | 22_30                    | ZM00145918           | ZM00145647            | CML395          |
| 34  | 6x1008          | GY20-WS           | 2          | GY    | WS          | 3.0       | 1.3            | 30.0              | 26_36                    | ZM00145278           | ZM00150949            | CML505          |
| 35  | 6x1122          | ASI15             | 2          | ASI   | WW          | 3.0       | 7.1            | 32.0              | 30_34                    | ZM00145576           | ZM00149238            | CZL03011        |
| 36  | 6x1018          | GY21              | 2          | GY    | WW          | 9.0       | 11.7           | 42.0              | 40_46                    | ZM00149310           | ZM00150756            | CZL99017        |
| 37  | 6x1024          | GY22              | 2          | GY    | WW          | 2.7       | 7.5            | 42.0              | 36_44                    | ZM00147397           | ZM00148345            | VL062590        |
| 38  | 6x1015          | GY23              | 2          | GY    | WW          | 5.0       | 6.1            | 50.0              | 44_58                    | ZM00150756           | ZM00148542            | CZL00009        |
| 39  | 6x1122          | ASI16-WS          | 2          | ASI   | WS          | 3.5       | 3.6            | 56.0              | 54_58                    | ZM00149124           | ZM00148001            | CZL03011        |
| 40  | 6x1017          | GY24              | 2          | GY    | WW          | 3.0       | 10.2           | 58.0              | 56_64                    | ZM00148589           | ZM00149238            | CZL00009        |
| 41  | 6x1023          | ASI17             | 2          | ASI   | WW          | 4.9       | 9.5            | 62.0              | 58_66                    | ZM00150880           | ZM00145647            | CZL0618         |
| 42  | 6x1023          | ASI18-WS          | 2          | ASI   | WS          | 4.1       | 6.3            | 66.0              | 58_70                    | ZM00150880           | ZM00145647            | CZL0618         |
| 43  | 6x1028          | ASI19-WS          | 2          | ASI   | WS          | 3.1       | 2.3            | 66.0              | 64_70                    | ZM00149406           | ZM00149124            | VL062645        |
| 44  | 6x1017          | GY25              | 2          | GY    | WW          | 4.4       | 10.4           | 80.0              | 72_90                    | ZM00145918           | ZM00150343            | CML539          |
| 45  | 6x1021          | GY26-WS           | 2          | GY    | WS          | 5.0       | 4.5            | 116.0             | 114_120                  | ZM00147812           | ZM00147913            | CZL0719         |
| 46  | 6x1017          | GY27              | 2          | GY    | WW          | 2.6       | 5.5            | 118.0             | 112_122                  | ZM00148212           | ZM00146060            | CML539          |
| 47  | 6x1028          | ASI20-WS          | 2          | ASI   | WS          | 2.6       | 3.1            | 122.0             | 112_136                  | ZM00150694           | ZM00149315            | CZL074          |
| 48  | 6x1008          | ASI21-WS          | 2          | ASI   | WS          | 2.8       | 0.1            | 128.0             | 122_132                  | ZM00145473           | ZM00145689            | CZL00009        |
| 49  | 6x1008          | GY28              | 2          | GY    | WW          | 4.7       | 5.7            | 134.0             | 130_136                  | ZM00146101           | ZM00146228            | CML505          |

|     |        |          |   |     |    |     |      |       |         |            |            |          |
|-----|--------|----------|---|-----|----|-----|------|-------|---------|------------|------------|----------|
| 50  | 6x1021 | ASI22    | 2 | ASI | WW | 2.6 | 1.1  | 136.0 | 134_138 | ZM00147991 | ZM00151261 | CZL0719  |
| 51  | 6x1019 | GY29     | 2 | GY  | WW | 4.0 | 4.1  | 146.0 | 140_152 | ZM00147913 | ZM00146060 | CZL0719  |
| 52  | 6x1019 | GY30     | 3 | GY  | WW | 2.6 | 4.5  | 2.0   | 0_8     | ZM00147604 | ZM00148816 | CZL04008 |
| 53  | 6x1116 | GY31     | 3 | GY  | WW | 5.5 | 4.4  | 2.0   | 0_4     | ZM00148816 | ZM00148974 | CKL09007 |
| 54  | 6x1021 | GY32-WS  | 3 | GY  | WS | 5.9 | 8.4  | 20.0  | 16_30   | ZM00147828 | ZM00146066 | CZL0719  |
| 55  | 6x1008 | ASI23-WS | 3 | ASI | WS | 2.9 | 4.3  | 22.0  | 8_36    | ZM00148816 | ZM00146066 | CML505   |
| 56  | 6x1115 | GY33     | 3 | GY  | WW | 2.7 | 4.8  | 38.0  | 18_46   | ZM00148713 | ZM00146998 | CKL09004 |
| 57  | 6x1021 | ASI24-WS | 3 | ASI | WS | 2.9 | 3.9  | 38.0  | 24_58   | ZM00146066 | ZM00145446 | CZL0719  |
| 58  | 6x1122 | ASI25-WS | 3 | ASI | WS | 2.6 | 3.9  | 40.0  | 34_44   | ZM00148067 | ZM00146826 | CKL09006 |
| 59  | 6x1021 | GY34     | 3 | GY  | WW | 5.2 | 13.0 | 48.0  | 38_58   | ZM00145446 | ZM00147996 | CZL0723  |
| 60  | 6x1028 | ASI26-WS | 3 | ASI | WS | 4.0 | 3.2  | 48.0  | 38_50   | ZM00148816 | ZM00145446 | VL062645 |
| 61  | 6x1023 | GY35     | 3 | GY  | WW | 3.5 | 7.8  | 52.0  | 48_54   | ZM00149582 | ZM00147407 | VL062655 |
| 62  | 6x1021 | ASI27    | 3 | ASI | WW | 3.0 | 6.6  | 60.0  | 58_66   | ZM00147996 | ZM00145332 | CZL0719  |
| 63  | 6x1019 | GY36     | 3 | GY  | WW | 2.9 | 5.8  | 72.0  | 66_80   | ZM00149385 | ZM00147285 | CZL04008 |
| 64  | 6x1120 | GY37     | 3 | GY  | WW | 4.1 | 8.7  | 78.0  | 70_86   | ZM00148770 | ZM00148805 | CML444   |
| 65  | 6x1008 | ASI28    | 3 | ASI | WW | 5.1 | 8.8  | 92.0  | 90_96   | ZM00150837 | ZM00148897 | CML505   |
| 66  | 6x1024 | ASI29    | 3 | ASI | WW | 2.7 | 4.9  | 94.0  | 92_110  | ZM00148897 | ZM00145344 | CZL02001 |
| 67  | 6x1028 | ASI30    | 3 | ASI | WW | 3.5 | 5.9  | 96.0  | 92_100  | ZM00145699 | ZM00147965 | CZL074   |
| 68  | 6x1020 | ASI31    | 3 | ASI | WW | 3.6 | 6.7  | 108.0 | 106_110 | ZM00147092 | ZM00147809 | CZL0724  |
| 69  | 6x1115 | GY38     | 3 | GY  | WW | 3.9 | 3.6  | 120.0 | 114_126 | ZM00147590 | ZM00149093 | CZL00003 |
| 70  | 6x1116 | GY39-WS  | 4 | GY  | WS | 2.8 | 3.8  | 8.0   | 6_12    | ZM00150249 | ZM00147956 | CML395   |
| 71  | 6x1121 | GY40     | 4 | GY  | WW | 4.0 | 2.5  | 10.0  | 6_14    | ZM00146008 | ZM00149291 | CKL09002 |
| 72  | 6x1015 | ASI33    | 4 | ASI | WW | 2.6 | 6.2  | 14.0  | 4_16    | ZM00151306 | ZM00149064 | CZL04003 |
| 73  | 6x1122 | ASI34-WS | 4 | ASI | WS | 2.9 | 3.5  | 26.0  | 22_30   | ZM00148614 | ZM00147855 | CKL09006 |
| 74  | 6x1117 | GY41     | 4 | GY  | WW | 4.0 | 8.7  | 30.0  | 26_34   | ZM00147680 | ZM00146138 | CKL09007 |
| 75  | 6x1116 | ASI35    | 4 | ASI | WW | 2.7 | 6.2  | 34.0  | 30_36   | ZM00150907 | ZM00146576 | CKL09007 |
| 76  | 6x1121 | GY42     | 4 | GY  | WW | 3.6 | 1.2  | 40.0  | 38_44   | ZM00146375 | ZM00149641 | CKL09002 |
| 77  | 6x1028 | GY43     | 4 | GY  | WW | 3.6 | 8.0  | 52.0  | 48_54   | ZM00146087 | ZM00147968 | VL062645 |
| 78  | 6x1028 | ASI36    | 4 | ASI | WW | 8.7 | 17.3 | 54.0  | 52_56   | ZM00147968 | ZM00145459 | VL062645 |
| 79  | 6x1120 | ASI37-WS | 4 | ASI | WS | 4.0 | 6.5  | 98.0  | 96_102  | ZM00147666 | ZM00149771 | CKL09001 |
| 80  | 6x1018 | GY44     | 4 | GY  | WW | 3.1 | 4.8  | 116.0 | 108_120 | ZM00146341 | ZM00146213 | CZL99017 |
| 81  | 6x1020 | ASI38-WS | 4 | ASI | WS | 2.9 | 4.0  | 122.0 | 110_126 | ZM00147170 | ZM00146254 | CZL0724  |
| 82  | 6x1121 | GY45-WS  | 5 | GY  | WS | 2.5 | 3.9  | 0.0   | 0_6     | ZM00145506 | ZM00148602 | CKL09002 |
| 83  | 6x1116 | ASI40    | 5 | ASI | WW | 2.6 | 2.8  | 6.0   | 4_8     | ZM00147505 | ZM00149114 | CML395   |
| 84  | 6x1028 | GY46     | 5 | GY  | WW | 2.8 | 3.5  | 12.0  | 0_30    | ZM00146756 | ZM00145442 | CZL074   |
| 85  | 6x1019 | GY47     | 5 | GY  | WW | 4.6 | 13.0 | 24.0  | 18_30   | ZM00146527 | ZM00151505 | CZL0719  |
| 86  | 6x1118 | GY48     | 5 | GY  | WW | 2.5 | 7.6  | 28.0  | 26_30   | ZM00147053 | ZM00145478 | CML444   |
| 87  | 6x1120 | GY49     | 5 | GY  | WW | 6.0 | 11.4 | 30.0  | 26_36   | ZM00150572 | ZM00151317 | CML395   |
| 88  | 6x1116 | GY50     | 5 | GY  | WW | 2.7 | 1.8  | 32.0  | 30_36   | ZM00146744 | ZM00148731 | CKL09007 |
| 89  | 6x1121 | GY51     | 5 | GY  | WW | 3.9 | 5.3  | 42.0  | 38_44   | ZM00147756 | ZM00146035 | CKL09002 |
| 90  | 6x1015 | GY52     | 5 | GY  | WW | 2.5 | 3.0  | 52.0  | 48_56   | ZM00145731 | ZM00149781 | CZL00009 |
| 91  | 6x1017 | GY53     | 5 | GY  | WW | 2.7 | 8.7  | 52.0  | 50_58   | ZM00146793 | ZM00147438 | CZL00009 |
| 92  | 6x1021 | GY54     | 5 | GY  | WW | 4.9 | 9.9  | 60.0  | 58_62   | ZM00145549 | ZM00145659 | CZL0723  |
| 93  | 6x1016 | GY55     | 5 | GY  | WW | 3.0 | 9.4  | 70.0  | 62_76   | ZM00151343 | ZM00151129 | CZL00009 |
| 94  | 6x1008 | GY56     | 5 | GY  | WW | 3.3 | 6.1  | 74.0  | 68_78   | ZM00148569 | ZM00146035 | CZL00009 |
| 95  | 6x1023 | ASI41    | 5 | ASI | WW | 4.7 | 7.7  | 82.0  | 78_88   | ZM00145873 | ZM00145478 | CZL0618  |
| 96  | 6x1021 | GY57-WS  | 5 | GY  | WS | 3.5 | 3.4  | 110.0 | 104_114 | ZM00145680 | ZM00151606 | CZL0723  |
| 97  | 6x1015 | GY58     | 5 | GY  | WW | 3.1 | 4.2  | 118.0 | 112_124 | ZM00148731 | ZM00145341 | CZL00009 |
| 98  | 6x1019 | ASI42    | 5 | ASI | WW | 3.5 | 7.5  | 118.0 | 116_122 | ZM00146069 | ZM00147337 | CZL04008 |
| 99  | 6x1016 | GY59     | 5 | GY  | WW | 2.8 | 7.6  | 126.0 | 122_144 | ZM00147212 | ZM00145680 | CZL00009 |
| 100 | 6x1016 | ASI43-WS | 5 | ASI | WS | 4.3 | 1.8  | 128.0 | 124_132 | ZM00147212 | ZM00145728 | CZL00009 |
| 101 | 6x1016 | ASI44    | 5 | ASI | WW | 7.6 | 4.7  | 128.0 | 122_144 | ZM00147212 | ZM00145728 | CZL00009 |
| 102 | 6x1018 | GY60-WS  | 5 | GY  | WS | 3.5 | 7.7  | 142.0 | 132_162 | ZM00146744 | ZM00145728 | CML505   |
| 103 | 6x1008 | GY61     | 5 | GY  | WW | 3.5 | 5.5  | 164.0 | 158_164 | ZM00145341 | ZM00147618 | CZL00009 |
| 104 | 6x1116 | GY62-WS  | 6 | GY  | WS | 3.1 | 2.4  | 0.0   | 0_2     | ZM00150684 | ZM00146199 | CKL09007 |
| 105 | 6x1120 | ASI53    | 6 | ASI | WW | 2.9 | 2.8  | 0.0   | 0_12    | ZM00148148 | ZM00151005 | CKL09008 |
| 106 | 6x1015 | ASI45    | 6 | ASI | WW | 3.4 | 7.8  | 2.0   | 0_10    | ZM00146808 | ZM00149379 | CZL04003 |

|     |        |          |   |     |    |     |      |       |         |            |            |          |
|-----|--------|----------|---|-----|----|-----|------|-------|---------|------------|------------|----------|
| 107 | 6x1019 | GY63     | 6 | GY  | WW | 3.2 | 3.1  | 6.0   | 0_8     | ZM00150684 | ZM00150913 | CZL04008 |
| 108 | 6x1122 | ASI46    | 6 | ASI | WW | 3.7 | 6.0  | 16.0  | 10_20   | ZM00146092 | ZM00145971 | CKL09006 |
| 109 | 6x1028 | GY64     | 6 | GY  | WW | 4.2 | 5.9  | 40.0  | 34_46   | ZM00145792 | ZM00148356 | CZL074   |
| 110 | 6x1122 | ASI47    | 6 | ASI | WW | 3.3 | 10.8 | 44.0  | 38_48   | ZM00147376 | ZM00145762 | CZL03011 |
| 111 | 6x1121 | GY65     | 6 | GY  | WW | 5.2 | 14.8 | 46.0  | 44_46   | ZM00145855 | ZM00149656 | CKL09002 |
| 112 | 6x1016 | GY66     | 6 | GY  | WW | 2.7 | 5.2  | 58.0  | 50_62   | ZM00145871 | ZM00145637 | CZL00009 |
| 113 | 6x1120 | ASI52    | 6 | ASI | WW | 3.4 | 6.1  | 72.0  | 64_78   | ZM00150166 | ZM00150103 | CKL09008 |
| 114 | 6x1021 | GY67     | 6 | GY  | WW | 6.6 | 18.0 | 80.0  | 74_84   | ZM00145762 | ZM00149548 | CZL0719  |
| 115 | 6x1024 | ASI48    | 6 | ASI | WW | 4.5 | 2.4  | 82.0  | 80_86   | ZM00145762 | ZM00150976 | CZL02001 |
| 116 | 6x1024 | GY68     | 6 | GY  | WW | 3.9 | 8.6  | 86.0  | 82_102  | ZM00150976 | ZM00147585 | VL062590 |
| 117 | 6x1023 | GY69     | 6 | GY  | WW | 5.3 | 8.3  | 90.0  | 84_94   | ZM00151524 | ZM00145320 | CZL0618  |
| 118 | 6x1021 | GY70-WS  | 6 | GY  | WS | 4.3 | 6.3  | 94.0  | 88_98   | ZM00145828 | ZM00148890 | CZL0719  |
| 119 | 6x1023 | ASI49-WS | 6 | ASI | WS | 3.0 | 7.6  | 98.0  | 94_106  | ZM00145320 | ZM00145828 | CZL0618  |
| 120 | 6x1023 | ASI50    | 6 | ASI | WW | 5.7 | 16.2 | 98.0  | 94_106  | ZM00145320 | ZM00145828 | CZL0618  |
| 121 | 6x1021 | ASI51-WS | 6 | ASI | WS | 2.9 | 1.5  | 116.0 | 112_122 | ZM00150103 | ZM00147479 | CZL0723  |
| 122 | 6x1015 | ASI54    | 7 | ASI | WW | 4.7 | 10.6 | 10.0  | 6_14    | ZM00148038 | ZM00146706 | CZL00009 |
| 123 | 6x1023 | GY71     | 7 | GY  | WW | 8.0 | 12.4 | 18.0  | 10_26   | ZM00146941 | ZM00146139 | VL062655 |
| 124 | 6x1021 | GY72     | 7 | GY  | WW | 3.8 | 8.3  | 32.0  | 22_34   | ZM00150786 | ZM00145934 | CZL0719  |
| 125 | 6x1024 | ASI55    | 7 | ASI | WW | 2.6 | 5.7  | 32.0  | 20_42   | ZM00146941 | ZM00149691 | CZL02001 |
| 126 | 6x1028 | ASI56    | 7 | ASI | WW | 3.9 | 2.2  | 34.0  | 32_36   | ZM00149389 | ZM00148038 | CZL074   |
| 127 | 6x1021 | GY73-WS  | 7 | GY  | WS | 2.7 | 5.0  | 36.0  | 26_48   | ZM00145934 | ZM00147097 | CZL0719  |
| 128 | 6x1017 | ASI57    | 7 | ASI | WW | 5.3 | 12.3 | 42.0  | 36_48   | ZM00149150 | ZM00145887 | CZL00009 |
| 129 | 6x1008 | GY74-WS  | 7 | GY  | WS | 2.7 | 4.8  | 46.0  | 44_50   | ZM00151492 | ZM00148038 | CZL00009 |
| 130 | 6x1008 | ASI58-WS | 7 | ASI | WS | 4.3 | 9.0  | 46.0  | 44_50   | ZM00151492 | ZM00148038 | CZL00009 |
| 131 | 6x1008 | ASI59    | 7 | ASI | WW | 3.5 | 7.4  | 50.0  | 48_54   | ZM00145921 | ZM00146706 | CZL00009 |
| 132 | 6x1118 | GY75     | 7 | GY  | WW | 2.7 | 4.1  | 52.0  | 48_52   | ZM00147114 | ZM00148616 | CML444   |
| 133 | 6x1120 | GY76     | 7 | GY  | WW | 2.7 | 6.2  | 58.0  | 42_60   | ZM00145961 | ZM00149261 | CML395   |
| 134 | 6x1017 | ASI60-WS | 7 | ASI | WS | 4.8 | 8.2  | 60.0  | 56_68   | ZM00149216 | ZM00150057 | CZL00009 |
| 135 | 6x1021 | GY77-WS  | 7 | GY  | WS | 3.4 | 7.4  | 68.0  | 60_78   | ZM00147512 | ZM00147408 | CZL0723  |
| 136 | 6x1016 | GY78     | 7 | GY  | WW | 3.0 | 5.4  | 70.0  | 62_80   | ZM00146706 | ZM00147512 | CZL99017 |
| 137 | 6x1020 | GY79-WS  | 7 | GY  | WS | 2.9 | 1.9  | 80.0  | 74_90   | ZM00148075 | ZM00149897 | CZL0724  |
| 138 | 6x1020 | ASI61-WS | 7 | ASI | WS | 3.8 | 6.9  | 90.0  | 82_94   | ZM00149897 | ZM00146081 | CZL0724  |
| 139 | 6x1120 | ASI62-WS | 7 | ASI | WS | 3.6 | 4.2  | 102.0 | 100_106 | ZM00146668 | ZM00148616 | CML395   |
| 140 | 6x1117 | ASI63-WS | 8 | ASI | WS | 2.6 | 2.2  | 14.0  | 12_16   | ZM00150790 | ZM00151627 | CKL09007 |
| 141 | 6x1021 | GY80-WS  | 8 | GY  | WS | 5.3 | 7.8  | 28.0  | 22_32   | ZM00149771 | ZM00150597 | CZL0723  |
| 142 | 6x1121 | GY81     | 8 | GY  | WW | 8.8 | 17.9 | 28.0  | 22_40   | ZM00150299 | ZM00146174 | CZL03011 |
| 143 | 6x1023 | ASI64-WS | 8 | ASI | WS | 3.4 | 4.3  | 40.0  | 24_48   | ZM00146129 | ZM00149199 | CZL0618  |
| 144 | 6x1020 | ASI65    | 8 | ASI | WW | 3.4 | 3.5  | 42.0  | 38_48   | ZM00149380 | ZM00146719 | CZL0723  |
| 145 | 6x1020 | ASI66-WS | 8 | ASI | WS | 2.7 | 5.8  | 46.0  | 40_48   | ZM00149380 | ZM00146719 | CZL0723  |
| 146 | 6x1117 | ASI67-WS | 8 | ASI | WS | 4.3 | 12.0 | 46.0  | 44_50   | ZM00150059 | ZM00146970 | CKL09007 |
| 147 | 6x1028 | GY82     | 8 | GY  | WW | 6.3 | 13.6 | 50.0  | 42_52   | ZM00150463 | ZM00147090 | CZL074   |
| 148 | 6x1015 | GY83     | 8 | GY  | WW | 4.3 | 8.4  | 56.0  | 52_58   | ZM00150765 | ZM00147431 | CZL00009 |
| 149 | 6x1020 | GY84-WS  | 8 | GY  | WS | 2.6 | 4.2  | 58.0  | 54_64   | ZM00146174 | ZM00149211 | CZL0723  |
| 150 | 6x1121 | ASI68-WS | 8 | ASI | WS | 3.2 | 9.2  | 60.0  | 50_68   | ZM00151209 | ZM00150573 | CKL09002 |
| 151 | 6x1024 | GY85     | 8 | GY  | WW | 5.7 | 17.5 | 66.0  | 62_68   | ZM00149832 | ZM00147803 | CZL02001 |
| 152 | 6x1028 | GY86     | 8 | GY  | WW | 2.6 | 4.8  | 70.0  | 64_70   | ZM00147637 | ZM00150597 | VL062645 |
| 153 | 6x1120 | ASI70    | 8 | ASI | WW | 2.9 | 8.2  | 82.0  | 68_86   | ZM00146174 | ZM00147431 | CKL09008 |
| 154 | 6x1018 | GY87     | 8 | GY  | WW | 5.4 | 7.6  | 94.0  | 88_100  | ZM00149841 | ZM00147637 | CZL99017 |
| 155 | 6x1020 | ASI69-WS | 8 | ASI | WS | 3.3 | 7.8  | 104.0 | 98_108  | ZM00146654 | ZM00146498 | CZL0724  |
| 156 | 6x1115 | GY88     | 8 | GY  | WW | 3.7 | 2.7  | 112.0 | 102_116 | ZM00146654 | ZM00150573 | CKL09004 |
| 157 | 6x1018 | GY89     | 8 | GY  | WW | 2.7 | 3.6  | 124.0 | 116_136 | ZM00147620 | ZM00150402 | CML505   |
| 158 | 6x1024 | GY90     | 9 | GY  | WW | 2.7 | 5.5  | 4.0   | 0_8     | ZM00148595 | ZM00146298 | CZL02001 |
| 159 | 6x1024 | ASI71    | 9 | ASI | WW | 3.6 | 4.3  | 4.0   | 0_8     | ZM00148595 | ZM00146298 | CZL02001 |
| 160 | 6x1117 | ASI72-WS | 9 | ASI | WS | 2.8 | 2.5  | 12.0  | 4_20    | ZM00146298 | ZM00149113 | CML444   |
| 161 | 6x1017 | GY91     | 9 | GY  | WW | 3.3 | 8.0  | 24.0  | 18_32   | ZM00145439 | ZM00150601 | CZL00009 |
| 162 | 6x1015 | ASI73    | 9 | ASI | WW | 4.6 | 1.5  | 28.0  | 26_30   | ZM00150601 | ZM00151266 | CZL04003 |
| 163 | 6x1116 | ASI74    | 9 | ASI | WW | 2.6 | 1.7  | 28.0  | 26_30   | ZM00151035 | ZM00145408 | CML395   |

|     |        |          |    |     |    |     |      |      |       |            |            |          |
|-----|--------|----------|----|-----|----|-----|------|------|-------|------------|------------|----------|
| 164 | 6x1021 | GY92-WS  | 9  | GY  | WS | 3.7 | 3.3  | 30.0 | 28_34 | ZM00146298 | ZM00150248 | CZL0719  |
| 165 | 6x1024 | ASI76    | 9  | ASI | WW | 2.8 | 2.5  | 36.0 | 18_42 | ZM00151468 | ZM00148685 | VL062590 |
| 166 | 6x1121 | ASI75-WS | 9  | ASI | WS | 3.4 | 3.7  | 36.0 | 30_42 | ZM00150428 | ZM00151231 | CZL03011 |
| 167 | 6x1028 | GY93     | 9  | GY  | WW | 3.7 | 5.2  | 48.0 | 40_58 | ZM00146800 | ZM00151035 | CZL074   |
| 168 | 6x1021 | ASI77    | 9  | ASI | WW | 2.9 | 4.2  | 48.0 | 38_52 | ZM00150703 | ZM00148817 | CZL0719  |
| 169 | 6x1023 | ASI78    | 9  | ASI | WW | 2.8 | 5.0  | 56.0 | 44_66 | ZM00151468 | ZM00148082 | CZL0618  |
| 170 | 6x1028 | ASI79-WS | 9  | ASI | WS | 3.9 | 2.7  | 62.0 | 58_68 | ZM00149322 | ZM00151224 | VL062645 |
| 171 | 6x1017 | GY94     | 9  | GY  | WW | 5.8 | 13.6 | 70.0 | 64_76 | ZM00147493 | ZM00145411 | CML539   |
| 172 | 6x1020 | GY95     | 9  | GY  | WW | 2.6 | 1.2  | 78.0 | 70_84 | ZM00151559 | ZM00145408 | CZL0723  |
| 173 | 6x1015 | GY96     | 9  | GY  | WW | 6.1 | 9.0  | 80.0 | 72_84 | ZM00150625 | ZM00147953 | CZL04003 |
| 174 | 6x1020 | ASI80-WS | 9  | ASI | WS | 3.4 | 6.1  | 90.0 | 86_96 | ZM00145937 | ZM00148777 | CZL0723  |
| 175 | 6x1008 | GY97     | 9  | GY  | WW | 3.0 | 4.3  | 94.0 | 82_98 | ZM00150625 | ZM00150318 | CML505   |
| 176 | 6x1122 | GY99     | 10 | GY  | WW | 2.9 | 1.5  | 0.0  | 0_4   | ZM00148757 | ZM00147067 | CKL09006 |
| 177 | 6x1116 | GY100    | 10 | GY  | WW | 4.6 | 18.2 | 12.0 | 10_14 | ZM00146514 | ZM00151364 | CML395   |
| 178 | 6x1028 | ASI81-WS | 10 | ASI | WS | 3.5 | 3.2  | 12.0 | 8_16  | ZM00146726 | ZM00145484 | CZL074   |
| 179 | 6x1116 | ASI82    | 10 | ASI | WW | 4.7 | 6.9  | 12.0 | 10_14 | ZM00146514 | ZM00151364 | CML395   |
| 180 | 6x1116 | GY101    | 10 | GY  | WW | 9.5 | 19.1 | 24.0 | 22_28 | ZM00146973 | ZM00146628 | CKL09007 |
| 181 | 6x1116 | ASI83    | 10 | ASI | WW | 5.5 | 9.5  | 24.0 | 22_28 | ZM00146973 | ZM00146628 | CKL09007 |
| 182 | 6x1020 | GY102    | 10 | GY  | WW | 6.0 | 4.6  | 26.0 | 22_28 | ZM00147067 | ZM00146248 | CZL0724  |
| 183 | 6x1120 | ASI84-WS | 10 | ASI | WS | 4.0 | 6.5  | 46.0 | 44_52 | ZM00146500 | ZM00149827 | CKL09008 |
